1 **Women’s Awareness of Obstetric Fistula and its Associated Factors Among**  
2 **Reproductive-Age Women in Ethiopia: A Multilevel Analysis Based on**  
3 **National Survey Data.**

4 Walleign Alemnew (WA)<sup>1</sup>, Bezawit Mulat (BM)<sup>2\*</sup>, Kegnie Shitu (KS)<sup>1</sup>

5 <sup>1</sup> Department of Health Education and Behavioral Sciences, Institute of Public Health College of  
6 Medicine, University of Gondar, Gondar, Ethiopia

7 <sup>2</sup> Department of Human Physiology, School of Medicine, College of Medicine and Health  
8 Sciences, University of Gondar, Gondar, Ethiopia

9 Walleign Alemnew

10 E-mail: [walleignaleminew@gmail.com](mailto:walleignaleminew@gmail.com)

11 Bezawit Mulat

12 E-mail: [mulatbezawit@gmail.com](mailto:mulatbezawit@gmail.com)

13 Kegnie Shitu

14 Email: [kegnsh@gmail.com](mailto:kegnsh@gmail.com)

15

16 **\*Corresponding Author**

17 Bezawit Mulat

18 E-mail: [mulatbezawit@gmail.com](mailto:mulatbezawit@gmail.com)

19 Cell Phone: +251963729635

20

21

22 **Abstract**

23 **Objective:** This study aimed to determine the magnitude and associated factors of women's  
24 awareness of obstetric fistula (OF).

25 **Methods:** This community based crosssectional study was conducted among 15,683  
26 reproductive-aged women. A multi-level multivariable logistic regression analysis employed. A  
27 95% CI and p-value < 0.05 were used to declare statistical significance.

28 **Result:** The magnitude of women's awareness of OF was 38% [95%CI: 0.37, 0.39]. Individual  
29 level variables such as being in the age group 20-25 [AOR=1.17; 95%CI:1.02, 1.35], 26-30  
30 [AOR=1.50; 95%CI: 1.27, 1.76] and >30 [AOR=1.76; 95%CI: 1.50, 2.07], being Muslim  
31 religion follower [AOR = 0.83; 95%CI: 0.73, 0.94], attending primary education [AOR=1.70;  
32 95%CI: 1.53, 1.89 ], attending secondary education [AOR=3.43; 95%CI: 2.95, 3.99] and  
33 attending higher education [AOR=5.88; 95%CI: 4.66, 7.42], history of pregnancy termination  
34 [AOR=1.31; 95%CI: 1.13, 1.51], media exposure at least once a week [AOR= 1.33; 95%CI: 1.2,  
35 1.49], internet use [AOR= 2.25; 95%CI: 1.84, 2.75], medium house hold wealth [AOR=1.17;  
36 95%CI: 1.02, 1.34], rich house hold wealth [AOR=1.50; 95%CI:1.31, 1.72] and community level  
37 factors including high community media exposure [AOR = 1.30; 95%CI: 1.05, 1.61], high  
38 community ANC rate [AOR=1.66; 95%CI: 1.37, 2.02] and low health facility distance problem  
39 [AOR=1.49; 95%CI: 1.23, 1.81] were significantly associated with awareness of OF.

40 **Conclusion:** The magnitude of women's awareness of OF was very low in Ethiopia. Maternal  
41 age, religion, being educated, media exposure, being from a wealthier household, low health  
42 facility distance problem, and high community ANC rate were significantly and positively  
43 associated factors with awareness of OF.

44

45

## 46 **Background**

47 Obstetric fistula is a life-altering birth associated injury [1] that creates an abnormal connection  
48 between the genital tract and the urinary tract (urogenital fistula) or the gastrointestinal tract  
49 (most commonly, rectovaginal fistula) that occur as the result of obstetric trauma, typically from  
50 prolonged obstructed labor[ 2, 3] . It is a public health concern for women and their communities  
51 within developing nations, particularly in Africa and Southeast Asia [4] and it is found to be one  
52 of the most visible indicators of maternal morbidity [5]. The World Health Organization  
53 estimates there are 130,000 new cases of obstetric fistula each year, calculated from an  
54 assumption that fistula is likely to occur in 2 percent of the 6.5 million cases of obstructed labor  
55 that occur in developing countries [2, 6]. Of these, around 33,000 women are found in Sub-  
56 Saharan Africa, and it affects about 1.62 women per 1000 reproductive age in Ethiopia [7, 8].  
57 Currently around 36,000 and 39,000 women living with obstetric fistula and that every year there  
58 are between 3,300 and 3,750 new cases of obstetric fistula in Ethiopia according to the problem  
59 analysis report [9].

60 Pieces of evidence show that the risk of the vaginal fistula is common in settings with a lack of  
61 inadequate emergency obstetric care, healthcare workforce shortages, and poor investment in  
62 maternity services [6, 10]. Further, sociocultural issues such as early marriage, harmful cultural  
63 practices like female genital mutilation, home-based childbirth, poor policy implementation of  
64 female education, and misconceptions about childbirth practices are other contributing factors for  
65 the high burden of obstetric fistula in Sub-Saharan Africa [11, 12]. Adequate information and  
66 awareness of the risk factors, causes, and treatment options for vaginal fistula may help women  
67 to take appropriate steps to prevent vaginal fistula. Generally, different researches reported that

68 still there is a low level of awareness about obstetric fistula in Africa, especially in Ethiopia. The  
69 magnitude of awareness was found to be 40.8% and 39.5% in Bench sheka zone, south, Ethiopia,  
70 and awi zone Amhara region, Ethiopia respectively [7, 9].

71 Despite the high burden of obstetric fistula in Sub-Saharan Africa, studies addressing the  
72 awareness of obstetric fistula among women are limited, particularly in Ethiopia. Therefore, this  
73 study aims to determine the magnitude of obstetric fistula awareness and factors that could  
74 contribute to the awareness of obstetric fistula among women of reproductive age in Ethiopia.  
75 Furthermore, findings from this analysis will assist policy-makers and public health  
76 programmers to understand the magnitude of obstetric fistula awareness and the contributory  
77 factors.

## 78 **Methods**

### 79 **Data source, population, and sampling procedure**

80 The present study was based on the most recent Ethiopian Demographic and Health Survey  
81 (EDHS) data. The survey was conducted from January 18, 2016, to June 27, 2016. For this  
82 survey, a complete list of 84, 915 Enumeration Areas (EAs) from the Ethiopian Population and  
83 Housing Census was used as a sampling frame. A stratified two-stage cluster sampling technique  
84 was employed. In the first stage, 645 EAs were selected. In the second stage, an average of 28  
85 households was selected per cluster/EA. The data is freely available in public and we accessed  
86 the dataset used for the present study after we registered and received an authentication letter  
87 from the Demographic and Health Survey (DHS) program at The DHS Program - Ethiopia:  
88 Standard DHS, 2016 Dataset. For this study, a total weighted sample of 15, 683 reproductive-  
89 age women were included. Detailed information about the sampling strategy, questioner, or other  
90 important information is available in the 2016 EDHS report.

## 91 **Variables of the Study**

92 The outcome variable of the present study was women's awareness of obstetric fistula. The  
93 variable was dichotomized into **1** = "ever heard of fistula" and **0** = "never heard of fistula". The  
94 independent variables were further classified into individual level (level 1) variables and  
95 community level (level 2) variables. Individual-level variables included age, marital status,  
96 religion, educational status, media exposure, internet access, family wealth index, sexual activity,  
97 birth history, pregnancy termination, current working status, and current pregnancy status.  
98 Whereas, community variables involved variables directly taken with no aggregation (residence  
99 and contextual region), and variables obtained by aggregating individual values into their  
100 respected community (community poverty, community female education, community media  
101 exposure, community antenatal care service utilization rate, and community health facility  
102 distance). Since the aggregate values of each variable didn't follow a normal distribution curve,  
103 we categorized the aggregate values of a cluster into groups based on median values.

## 104 **Operational definitions**

105 **Household wealth quintile:** The wealth index classifications were done in quintiles: poorest;  
106 poor; middle; rich; richest. These were computed using principal component analyses (PCA).  
107 This variable was further categorized into three categories (Poor, Medium, and Rich) by merging  
108 the lower two (poorest and poor) quantiles and the upper two (richest and rich) quantiles.

109 **Media Exposure:** This variable was computed from the frequency of exposure to the two  
110 commonest mass media routes (radio and television). In this study exposure to  
111 magazines/newspapers was excluded because little (<5%) women were exposed to this channel.  
112 The variable was categorized into three categories: no exposure to either media route; exposure  
113 to either one of the two routes; and exposure to both within a week.

114 **Contextual region:** For this survey regions were categorized into three categories (agrarian,  
115 pastoral, and metropolitan) that may have a strong relationship to health information seeking and  
116 awareness of obstetric fistula. The Tigray, Amhara, Oromia, SNNP, Gambella, and Beneshangul  
117 Gumuz were recorded as agrarian. The Somali and Afar regions were merged to form the  
118 pastoralist region and the city administrations- Addis Ababa, Dire Dawa, and Harar were  
119 combined as metropolitan [1].

120 **Community female education:** This is the aggregate value of the educational levels of women  
121 based on the average of proportions of educational levels in the community. It was defined as  
122 low if the proportion of women with secondary education & above in the community was 0 –  
123 12.4 % and high if the proportion was 12.5 –100 %.

124 **Community media exposure:** This variable was derived from the individual responses for  
125 exposure to radio or television. It was defined as low if the proportion of women exposed to  
126 media in the community was 0–18.7 % and high if the proportion was 18.8–100 %.

127 **Community ANC utilization rate:** This variable is also derived from the individual values for  
128 ANC utilization. It was defined as low if the proportion of women who attended at least one  
129 ANC visit in the community was 0 – 81.3 % and high if the proportion was between 81.4 –100  
130 %.

131 **Community poverty:** With the same procedure, this variable is also derived from an individual  
132 household's wealth index. It was defined as high if the proportion of women from the two lowest  
133 wealth quintiles in a given community was 25.9–100 % and low if the proportion was 0–26 %.

134 **Community distance to the health facility:** The variable was aggregated from individual  
135 perceived distance to a health facility is a big problem. It was as categorized as low if the

136 proportion of women who perceived health facility distance as a big problem in the community  
137 was 0–42.2% and categorized as high if the proportion was between 42.2% and 100%.

### 138 **Data processing and Analysis**

139 Data were extracted from individual records (IR) files and further coding and transformations  
140 were done using statistical software, STATA version 14. The weighted samples were used for  
141 analysis to adjust for unequal probability of selection and non-response in the original survey.  
142 Since the EDHS employed multi-stage stratified cluster sampling techniques, the data have a  
143 hierarchical structure. Therefore, a multivariable multilevel binary logistic regression model was  
144 used to estimate the fixed and random effects of the factors associated with awareness of fistula.  
145 Four models were constructed. The first model also called an empty model which was fitted  
146 without any explanatory variables. This model is important for understanding the community  
147 variations, and we used it as a reference to estimate how much community factors were able to  
148 explain the observed variations in the awareness of fistula. Moreover, this model was used to  
149 justify the use of a multilevel statistical framework as it is a litmus paper on whether multilevel  
150 or the traditional logistic regression should be used. It was assessed using the Likelihood Ratio  
151 test (LR), Median Odds Ratio (MOR), Intra-class Correlation Coefficient (ICC), and  
152 Proportional Change of Variance (PCV). The second model contained only individual-level  
153 factors. The third contained only community-level factors. Whereas, the final (fourth) model  
154 containing both individual and community-level factors. Moreover, the model comparison was  
155 done using model deviance, a model with the lowest deviance selected for reporting and  
156 interpretation results.

157

158

159

160 **Result**

161 **Individual-level factors**

162 A total of 15683 reproductive-age women were included in this study. The median age of the  
163 participants was 27 with an inter-quartile range of 15. Nearly half (47.8%) of the participants  
164 didn't attend any formal education and more than half (63.8%) of them were married. Only one-  
165 third (33.3%) of them were employed during the survey. Regarding the reproductive history,  
166 about 77% (12033), 67.5 (10587), and 7.2% (1135) of the participants were ever had sex, ever  
167 had a child, and currently pregnant respectively. Moreover, only 18.5% (2,896), and 4.4% (693)  
168 of women had been exposed to either television or radio at least once a week and had ever used  
169 the internet respectively (Table 1).

170 **Table 1: Sociodemographic and sexual characteristics of the reproductive age**  
171 **women in Ethiopia (n = 15, 683)**

| Variables                 | Frequency | Proportion |
|---------------------------|-----------|------------|
| Age                       |           |            |
| 15-19                     | 3, 381    | 21.6       |
| 20-25                     | 3, 655    | 23.3       |
| 26-30                     | 2, 882    | 18.4       |
| >=31                      | 5, 765    | 36.7       |
| Religion                  |           |            |
| Cristian                  | 10, 580   | 67.4       |
| Muslim                    | 4, 893    | 31.1       |
| Others                    | 205       | 1.3        |
| Highest educational level |           |            |
| No-formal education       | 7498      | 47.8       |
| Primary                   | 5490      | 35         |
| Secondary                 | 1818      | 11.6       |
| Higher                    | 877       | 5.6        |
| Marital status            |           |            |
| Married                   | 10014     | 63.8       |
| Unmarried                 | 5669      | 36.2       |
| Ever had a child          |           |            |
| No                        | 5096      | 32.5       |

|                                     |        |      |
|-------------------------------------|--------|------|
| Yes                                 | 10587  | 67.5 |
| Sexual experience                   |        |      |
| Never had sex                       | 3650   | 23.3 |
| Ever had sex                        | 12033  | 76.7 |
| Currently pregnant                  |        |      |
| No or unsure                        | 14548  | 92.8 |
| Yes                                 | 1135   | 7.2  |
| Ever had a terminated pregnancy     |        |      |
| No                                  | 14447  | 92.1 |
| Yes                                 | 1236   | 7.9  |
| Mass media exposure (TV/Radio)      |        |      |
| Both less than a week or not at all | 11,702 | 74.6 |
| Either at least once a week         | 2,896  | 18.5 |
| Both at least once a week           | 1,085  | 6.9  |
| Use of Internet                     |        |      |
| Never                               | 14,904 | 95.0 |
| Ever                                | 693    | 4.4  |
| Currently working                   |        |      |
| No                                  | 10,463 | 66.7 |
| Yes                                 | 5,220  | 33.3 |
| Household wealth Index              |        |      |
| Poor                                | 8,420  | 53.7 |
| Medium                              | 3,100  | 19.8 |
| Rich                                | 4,164  | 26.5 |

172

173 **Community-level variables**

174 The majority (77.8%) of the participants were from rural residency. About 50.8% (7,714), 60.3%  
 175 (9,452), 58.0% (9,089), and 62.8% (9,848) were from a community where there is high poverty  
 176 low female education, low media exposure and low ANC utilization rate respectively (Table 2).

177 **Table 2: Summary result of community-level factors of women's awareness of obstetric**

178 **fistula in Ethiopia (n=15, 683)**

| Variables         | Frequency | Proportion |
|-------------------|-----------|------------|
| Residence         |           |            |
| Urban             | 3,476     | 22.2       |
| Rural             | 12,207    | 77.8       |
| Contextual Region |           |            |

|                                              |        |      |
|----------------------------------------------|--------|------|
| Agrarian                                     | 13,870 | 88.5 |
| Pastoral                                     | 792    | 5.0  |
| Metropolitan                                 | 1,021  | 6.5  |
| Community poverty                            |        |      |
| Low                                          | 7,969  | 49.2 |
| High                                         | 7,714  | 50.8 |
| Community female education                   |        |      |
| Low                                          | 9,452  | 60.3 |
| High                                         | 6,231  | 39.7 |
| Community media exposure                     |        |      |
| Low                                          | 9,089  | 58.0 |
| High                                         | 6,594  | 42.0 |
| Community ANC utilization rate               |        |      |
| Low                                          | 9,848  | 62.8 |
| High                                         | 5,835  | 37.2 |
| Distance to Health facility is a big problem |        |      |
| Low                                          | 6,656  | 42.4 |
| High                                         | 9,027  | 57.6 |

179

## 180 **Awareness of obstetric fistula**

181 The overall prevalence of awareness of fistula among reproductive-age women was 38% (95%  
182 CI: 37%-39%).

## 183 **Random effect and Model comparison**

184 As is depicted in table 4 the null model revealed that awareness of fistula was significantly  
185 varied across communities/clusters. This was assessed by the ICC value in the null model by  
186 which 36.0% of the total variation in awareness of fistula was due to the difference between  
187 clusters. Moreover, the MOR in the null model, which was 3.63 (95% CI: (3.32, 3.97)),  
188 indicated that there was a significant variation between clusters. This shows if a woman moves to  
189 another area with a higher probability of awareness of fistula, her risk of having awareness of  
190 fistula will increase 3.63 times. The final model that included both the individual and community  
191 level factors explained the greatest variance (52 %) in fistula awareness as it was indicated by  
192 PCV. All of the three parameters revealed that the effect of clustering was significant. Indeed,

193 based on model fit comparison indices, the final model was found to be the best-fitted model  
 194 (had the lowest deviance) (Table 3).

195 **Table 3: Random effect model and model fitness for factors associated with women's**  
 196 **awareness of obstetric fistula in Ethiopia (n=15, 683)**

| Measure of variation                | Model 1(null)       | Model 2             | Model 3             | Model 4          |
|-------------------------------------|---------------------|---------------------|---------------------|------------------|
| Community level variations (SE)     | 1.84 (0.18)         | 0.85(0.07)          | 0.69 (.06)          | 0.68 (0.06)      |
| Intra-class correlation coefficient | 0.360               | 0.211               | 0.174               | .171             |
| Median odds ration                  | 3.63<br>(3.32,3.97) | 2.40<br>(2.24,2.58) | 2.20<br>(2.07,2.35) | 2.19 (2.06,2.34) |
| Proportional Change of Variance     | Reference           | 0.414               | 0.516               | 0.52             |
| Model fitness                       |                     |                     |                     |                  |
| Deviance                            | 18290.62            | 16908.39            | 17801.16            | 16775.54         |

197 **Individual and community level factors associated with women's awareness of**  
 198 **obstetric fistula**

199 The multivariable multilevel logistic regression analysis showed that age, religion, education,  
 200 ever pregnancy termination, media exposure, internet use, household wealth index, community  
 201 media exposure, community health facility distance problem, and community ANC utilization  
 202 rate were significantly associated with women's awareness of obstetric fistula at p-value <0.05.

203 The odds of having awareness of fistula was higher among women with the age of 20-25 years  
 204 old (AOR =1.17, 95% CI: 1.02, 1.35)), 26-30 years old (AOR= 1.5, 95% CI: (1.27, 1.76)) and >  
 205 30 years old (AOR= 1.76, 95% CI: 1.5, 2.07) as compared to women with the age of 15-19 years  
 206 old. Women of Islamic religion followers had 17% lower odds of having fistula awareness  
 207 (AOR= 0.83, 95% CI: (0.73, 0.94) than Christianity followers. Women with primary (AOR= 1.7,

208 95% CI: (1.53, 1.89)), secondary (AOR= 3.43; 95% CI: (2.95, 3.99)), and tertiary education  
 209 (AOR= 5.88; 95% CI: (4.66, 7.42)) had higher odds of having awareness of fistula than women  
 210 with no formal education respectively. Moreover, the odds of having fistula awareness were  
 211 higher among women who had ever terminated pregnancy than their counterparts (AOR=1.31,  
 212 95% CI: (1.13, 1.51)). Women who were exposed to radio and /or TV at least once a week were  
 213 more likely to have awareness of fistula than those who were exposed less than a week/ not at all  
 214 (AOR = 1.33 95% CI: (1.2, 1.49)). Moreover, the odds of having awareness of fistula were 2.3  
 215 times higher among women who had ever used the internet (AOR= 2.25, 95% CI: (1.84, 2.75)).  
 216 Regarding Woman's family wealth index, a woman from a family with the highest two quantiles  
 217 (rich) and third quantile (medium) was more likely to have awareness of fistula as compared to a  
 218 woman from a family with the lowest two quantiles (AOR=1.17, 95% CI: (1.02, 1.34)) and  
 219 (AOR= 1.50, 95% CI: (1.31, 1.72)) respectively. The odds of having fistula awareness were 1.3  
 220 (AOR=1.30 95%CI: (1.05, 1.61)), 1.66 (AOR=1.66, 95% CI: (1.37, 2.02)) and 1.49 (AOR=1.49,  
 221 95% CI: (1.23, 1.81) times higher among a woman from a community with high media exposure,  
 222 high ANC utilization, and high community health distance problem respectively (Table 4).

223 **Table 4: A multilevel logistic regression analysis of factors associated with women's**  
 224 **awareness of obstetric fistula among reproductive age women in Ethiopia (n=15, 683)**

| Variables | Model II<br>AOR (95% CI) | Model III<br>AOR (95% CI) | Model IV<br>AOR (95% CI) |
|-----------|--------------------------|---------------------------|--------------------------|
| Age       |                          |                           |                          |
| 15-19     | 1                        |                           | 1                        |
| 20-25     | 1.20 (1.04, 1.38) *      |                           | 1.17 (1.02, 1.35)<br>*   |
| 26-30     | 1.57 (1.33, 1.85) **     |                           | 1.50 (1.27, 1.76)<br>**  |
| >30       | 1.87 (1.59, 2.20) **     |                           | 1.76 (1.50, 2.07)<br>**  |

|                           |                      |                      |
|---------------------------|----------------------|----------------------|
| Religion                  |                      |                      |
| Christians                | 1                    | 1                    |
| Muslim                    | 0.77 (0.67, 0.87) ** | 0.83 (0.73, 0.94) ** |
| Education                 |                      |                      |
| No formal Education       | 1                    | 1                    |
| Primary                   | 1.79 (1.61, 1.99) ** | 1.70 (1.53, 1.89) ** |
| Secondary                 | 3.77 (3.25, 4.38) ** | 3.43 (2.95, 3.99) ** |
| Higher                    | 6.50 (5.16, 8.18) ** | 5.88 (4.66, 7.42) ** |
| History of birth          |                      |                      |
| No                        | 1                    | 1                    |
| Yes                       | 1.11 (0.96, 1.29)    | 1.14 (0.98, 1.33)    |
| Sex history               |                      |                      |
| No                        | 1                    | 1                    |
| Yes                       | 1.15 (0.98, 1.35)    | 1.16 (0.99, 1.35)    |
| Ever terminated pregnancy |                      |                      |
| No                        | 1                    | 1                    |
| Yes                       | 1.31 (1.13, 1.52) ** | 1.31 (1.13, 1.51) ** |
| Media exposure            |                      |                      |
| Less than a week/never    | 1                    | 1                    |
| At least once a week      | 1.46 (1.31, 1.62) ** | 1.33 (1.2, 1.49) **  |
| Internet use              |                      |                      |
| Never                     | 1                    | 1                    |
| Ever                      | 2.43 (1.99, 2.96) ** | 2.25 (1.84, 2.75) ** |
| Currently working         |                      |                      |
| No                        | 1                    | 1                    |
| Yes                       | 1.12 (1.03, 1.23) *  | 1.10 (0.9, 1.19)     |
| Household wealth index    |                      |                      |
| Poor                      | 1                    | 1                    |
| Medium                    | 1.27 (1.11, 1.45) ** | 1.17 (1.02, 1.34) *  |
| Rich                      | 1.92 (1.69, 2.17) ** | 1.50 (1.31, 1.72) ** |

|                                  |                      |                         |
|----------------------------------|----------------------|-------------------------|
| Residence                        |                      |                         |
| Rural                            | 1                    | 1                       |
| Urban                            | 1.62 (1.23, 2.15) ** | 1.11 (0.84, 1.48)       |
| Contextual region                |                      |                         |
| Pastorals                        | 1                    | 1                       |
| Agrarians                        | 1.28 (1.07, 1.53) *  | 1.09 (0.91, 1.31)       |
| Metropolitans                    | 1.29 (0.99, 1.70)    | 0.97 (0.74, 1.28)       |
| Community-level poverty          |                      |                         |
| High                             | 1                    | 1                       |
| low poverty                      | 1.17 (0.94, 1.46)    | 0.93(0.74, 1.16)        |
| Community female education       |                      |                         |
| Low                              | 1                    | 1                       |
| High                             | 1.57 (1.27, 1.93) ** | 1.09 (0.88, 1.34)       |
| Community media exposure         |                      |                         |
| Low                              | 1                    | 1                       |
| High                             | 1.49 (1.21, 1.84) ** | 1.30 (1.05, 1.61)<br>*  |
| Community ANC rate               |                      |                         |
| Low                              | 1                    | 1                       |
| High                             | 1.81 (1.49, 2.20) ** | 1.66 (1.37,2.02)<br>**  |
| Health facility distance problem |                      |                         |
| High                             | 1                    | 1                       |
| Low                              | 1.55 (1.28, 1.88) ** | 1.49 (1.23, 1.81)<br>** |

225 *Note: \* statistically significant at p value < 0.05, \*\* statistically significant at p value < 0.01,*  
226 *Model II= a model contained only individual level factors, Model III= a model contained only*  
227 *community level factors, Model IV= a model contained both the individual and community level*  
228 *factors*

229

## 230 **Discussion**

231 The study aimed to assess the magnitude and associated factors of awareness of fistula in  
232 Ethiopia using EDHS 2016 data. According to the findings of this study, the estimated  
233 magnitude of fistula awareness in Ethiopia was 38% which is consistent with studies done in  
234 Bench sheka zone, south, Ethiopia, and Awi zone Amhara region Ethiopia 40.8% and 39.5%  
235 respectively [7, 9]. The possible justification for the similarity might be due to the same socio-

236 demographic characteristic of the respondents. Whereas the finding is lower than studies  
237 conducted in different countries like Nigeria (57.8%), Ghana (45.8%), Nepal (72.99%), and  
238 Dabat, northwest, Ethiopia (54.7%)[8, 13-16]. The difference might be due to the study period,  
239 study population, study design, and socio-demographic characteristics. In addition to these, the  
240 above studies were based on small sample size or they are mostly facility and community-based  
241 cross-sectional studies.

242 In multivariable multilevel logistic regression analysis being in the age group 20-25, 26-30 years  
243 and, being Muslim religion follower, attending primary education, attending secondary education  
244 and attending higher education, history of pregnancy termination, media exposure at least once a  
245 week, internet use, medium household wealth, rich households wealth, community ANC and low  
246 health facility distance were significantly associated with fistula awareness in Ethiopia.

247 Older women had high odds of fistula awareness compared to young age women; this is might be  
248 due to that older women have had different or multiple exposures to media, different health  
249 education forums and they have had better opportunities to access/engage in health care services  
250 including counseling services [11]. Attending formal education has had higher odds than not  
251 attending formal education for fistula awareness. The finding agrees with studies done in the  
252 Awi zone of North West Ethiopia, Bench sheka zone, south, Ethiopia Burkina Faso, and  
253 Northern Ghana [7, 9, 11]. The possible explanation for these might be those attending formal  
254 education have greater opportunities to get information, asking, and getting health services than  
255 those who hadn't attended formal education.

256 Besides, our study reveals that previous experience or exposure to pregnancy termination had  
257 statistical significance with the level of fistula awareness. Women who got pregnancy  
258 termination history or experience were 1.31 times more likely to have a better awareness than  
259 those who hadn't get pregnancy termination experiences. The possible justification may be

260 getting or seeking health care services may create an indirect opportunity for counseling and  
261 health education; these may increase the level of awareness or their knowledge towards fistula.

262 In this study, community ANC rate has a significant association with awareness on fistula, those  
263 who have high community ANC rate have high odds compared to low community ANC rate.  
264 The finding is more supported with a study conducted in the Amhara region, Delanta woreda and  
265 Asela, Oromia region [17, 18] this implies that more awareness regarding fistula might be linked  
266 to ANC coverage increment where women can be counseled about maternal health issues.

267 Other important factors which have a significant association with fistula awareness were wealth  
268 quin-tiles, and access to information dissemination platforms (mobile and internet utilization) in  
269 this study, which had also been previously reported in studies [19-22] conducted in different  
270 areas.

271 In this study, there was a significant association between women's awareness about fistula and  
272 distance to the nearby health facility. For women who perceived health, facility distance as a low  
273 problem in the community, their awareness is 1.55 more likely to be good than those women  
274 who perceived health facility distance as a high problem. The finding is supported by the studies  
275 in Ethiopia and China respectively [23, 24] that identify the distance to the health care facility  
276 was linked with poor knowledge related to fistula and poor health-seeking behavior. This might  
277 be due to as the health facility becomes near; women are willing to visit the health care facilities  
278 and have got a chance to attend health-related information and education.

### 279 **Conclusion and recommendations**

280 The magnitude of awareness towards fistula was very low in Ethiopia. Maternal age, religion,  
281 being educated, media exposure, from high wealth family, low distance of health facility

282 problem, and high community ANC rate are factors that were significantly and positively  
283 associated with women's awareness towards fistula. Thus, community awareness creation  
284 actions are mandatory to offer accurate information on the risk factors, causes, and treatment  
285 options of obstetric fistula.

#### 286 **List of abbreviations**

287 ANC Antenatal care, BCC Behavioral Change Communication, EDHS Ethiopian Demographic  
288 and Health Survey, AOR Adjusted Odds Ratio, ICC Intra Class Correlation, MOR Median Odd  
289 Ratio PCV Proportional Change in Variance

#### 290 **Ethics approval**

291 We registered our research project at the Demographic and Health Survey by submitting a  
292 concept note concerning the topic of interest. After evaluation of our concept note the  
293 International Review Board of DHS program data archivists gave us a permission letter to  
294 download use the dataset for this registered research project.

#### 295 **Consent for publication**

296 Not applicable.

#### 297 **Availability of data and materials**

298 The dataset used for the analysis the present study is freely available at: <https://dhsprogram.com>

#### 299 **Competing interests**

300 The authors declare that they have no competing interests

#### 301 **Funding**

302 There was no fund/grant received for this research project

303 **Authors' contributions**

304 WA, BM and KS were involved in inception, methods and acquisition of the data. KS did data  
305 extraction and formal analysis. WA and BM did the interpretation of results and writing the draft  
306 manuscript. WA, BM and KS were involved in project administration and revising the final  
307 manuscript. All authors read and approved the final manuscript.

308 **Acknowledgments**

309 We would like to acknowledge the MEASURE DHS program for permitting us to obtain and use  
310 dataset used for this study.

311

312

313

314

315 **References**

- 316 1. Swain D, Parida SP, Jena SK, Das M, Das H. Prevalence and risk factors of obstetric  
317 fistula: implementation of a need-based preventive action plan in a South-eastern rural  
318 community of India. *BMC women's health*. 2020;20(1):1-10.
- 319 2. UptoDate, Obstetric fistulas in resource-limited settings. Available from:  
320 <https://www.uptodate.com/contents/obstetric-fistulas-in-resource-limited-settings/abstract/1>.
- 321 3. Animut M, Mamo A, Abebe L, Berhe MA, Asfaw S, Birhanu Z. "The sun keeps rising  
322 but darkness surrounds us": a qualitative exploration of the lived experiences of women with  
323 obstetric fistula in Ethiopia. *BMC women's health*. 2019;19(1):1-10.
- 324 4. Tunçalp Ö, Tripathi V, Landry E, Stanton CK, Ahmed S. Measuring the incidence and  
325 prevalence of obstetric fistula: approaches, needs and recommendations. *Bulletin of the World  
326 Health Organization*. 2014;93:60-2.
- 327 5. Yismaw L, Alemu K, Addis A, Alene M. Time to recovery from obstetric fistula and  
328 determinants in Gondar university teaching and referral hospital, northwest Ethiopia. *BMC  
329 women's health*. 2019;19(1):1-8.
- 330 6. Kasamba N, Kaye DK, Mbalinda SN. Community awareness about risk factors,  
331 presentation and prevention and obstetric fistula in Nabitovu village, Iganga district, Uganda.  
332 *BMC pregnancy and childbirth*. 2013;13(1):1-10.
- 333 7. Balcha WF, Nigussie AA, Beyene FY, Tesfu AA. Awareness and Its Associated Factors  
334 of Obstetrics Fistula among Antenatal Care Attendees in Injibara Town Health Institutions, Awi  
335 Zone, North West, Ethiopia, 2019. *Journal of Pregnancy*. 2020;2020.
- 336 8. Lucy I, Kingsley C, Japari M, Aaron M, Ayobami A, Steve T. Assessment of the  
337 Knowledge and Obstetric Features of Women Affected By Obstetric Fistula at Obstetric Fistula  
338 Centre in Bingham University Teaching Hospital, Jos. Nigeria. *Journal of Obstetrics and  
339 Gynecology*. 2020;1(1):1-9.
- 340 9. Asefa Z, Amenu D, Berhe A. Awareness of Obstetric Fistula and its Associated Factors  
341 among Reproductive-age Group Women in Bench Sheko Zone, Southwest, Ethiopia.  
342 Community based Cross-Sectional Study. *J Women's Health Care*. 2020;9(509):2167-0420.20.
- 343 10. Adler A, Ronsmans C, Calvert C, Filippi V. Estimating the prevalence of obstetric  
344 fistula: a systematic review and meta-analysis. *BMC pregnancy and childbirth*. 2013;13(1):1-14.
- 345 11. Morhason-Bello IO, Kareem YO, Abdus-Salam RA, Bello OO, Lawal OO, Akinlusi FM,  
346 et al. Factors associated with the awareness of vaginal fistula among women of reproductive age:  
347 findings from the 2018 Nigerian demographic health cross-sectional survey. *BMJ open*.  
348 2020;10(11):e040078.
- 349 12. Deribe K, Fronterre C, Dejene T, Biadgilign S, Deribew A, Abdullah M, et al. Measuring  
350 the spatial heterogeneity on the reduction of vaginal fistula burden in Ethiopia between 2005 and  
351 2016. *Scientific reports*. 2020;10(1):1-10.
- 352 13. Ezeonu P, Ekwedigwe K, Isikhuemen M, Eliboh M, Onoh R, Lawani L, et al. Awareness  
353 of obstetric vesicovaginal fistula among pregnant women in a rural hospital. *Advances in  
354 Reproductive Sciences*. 2017;5(3):39-46.
- 355 14. Saeed M, Alhassan A, Opare-Asamoah K, Kuubiere C. A survey on obstetric fistula  
356 awareness in Northern Ghana. *Eur J Exp Biol*. 2014;4(4):178-82.
- 357 15. Bashah DT, Worku AG, Mengistu MY. Do community members are aware of obstetric  
358 fistula? A community based cross sectional study, Dabat district, Northwest Ethiopia.

- 359 16. Gurung S, Panthi V, Kachapati A. Awareness Regarding Vesicovaginal Fistula among  
360 Women Residing in A Municipality of Kapilvastu. *Journal of Universal College of Medical*  
361 *Sciences*. 2018;6(2):46-50.
- 362 17. Seteamlak A. Young Women's Knowledge on Prevention of Obstetrics Fistula and its  
363 Associated Factors in Delanta District, Amhara Region, North-East Ethiopia: Harmaya  
364 University; 2016.
- 365 18. Defar s. Awareness on obstetric fistula and its associated factors among reproductive age  
366 women in asella town oromia region, ethiopia. 2018. Available from:  
367 <http://localhost:80/xmlui/handle/123456789/14719>
- 368 19. Basheer SA, Pumpaibool T. Knowledge, attitude and maternal health care utilization  
369 among married women of reproductive age towards vesicovaginal fistula in Kebbi state, Nigeria.  
370 *Journal of Health Research*. 2015;29(2):93-100.
- 371 20. Azanu WK, Dassah ET, Agbeno EK, Ofori AA, Opare Addo HS. Knowledge of  
372 obstetric fistula among prenatal clinic attendees and midwives in Mfantseman municipality,  
373 Ghana. *International Journal of Gynecology & Obstetrics*. 2020;148:16-21.
- 374 21. Kasamba N, Kaye DK, Mbalinda SN. Community awareness about risk factors,  
375 presentation and prevention and obstetric fistula in Nabitovu village, Iganga district, Uganda-  
376 *BMC Pregnancy and Childbirth*-Vol. 13, 1-ISBN: 1471-2393-p. 229. 2014.
- 377 22. Banke-Thomas AO, Kouraogo SF, Siribie A, Taddese HB, Mueller JE. Knowledge of  
378 obstetric fistula prevention amongst young women in urban and rural Burkina Faso: a cross-  
379 sectional study. *PloS one*. 2013;8(12):e85921.
- 380 23. Tollosa DN, Kibret MA. Causes and consequences of obstetric fistula in Ethiopia: a  
381 literature review. *International Journal of Medical Research & Health Sciences*. 2013;2(2):261-7.
- 382 24. Yuan F, Qian D, Huang C, Tian M, Xiang Y, He Z, et al. Analysis of awareness of health  
383 knowledge among rural residents in Western China. *BMC public health*. 2015;15(1):1-8.

384

385
